# Supplementary material
Source: PubMed Central journal article supplement (PMC10485742)
Supplement: jamaophthalmol-e233877-s001.pdf [file jamaophthalmol-e233877-s001.pdf]

## Supplementary Online Content

Kastner A, Stuart KV, Montesano G, et al. Calcium-channel blocker use and associated glaucoma and related traits among UK Biobank participants. *JAMA Ophthalmol*. Published online September 7, 2023.  
doi:10.1001/jamaophthalmol.2023.3877

### eMethods

**eTable 1.** Full Calcium Channel Blocker Code List Used to Identify Medication Users in This UK Biobank Study

**eTable 2.** Full Regression Models for the Association of Calcium Channel Blocker Use With Glaucoma and Intraocular Pressure in the UK Biobank

**eTable 3.** Full Regression Models for the Association of Calcium Channel Blocker Use With OCT-Derived Inner Retinal Parameters in the UK Biobank

**eTable 4.** Sensitivity Analyses: Association of Calcium Channel Blocker Use With Glaucoma Status in the UK Biobank

**eFigure.** Interaction of Calcium Channel Blocker Use and Hypertension for the Association With Glaucoma in the UK Biobank

### eReferences

This supplementary material has been provided by the authors to give readers additional information about their work.

## eMethods

### Study population

UK Biobank participants were recruited through National Health Service (NHS) registers and invited to attend one of 22 assessment centers across the United Kingdom (UK) where extensive phenotypic information and biological samples were collected.<sup>1,2</sup> After providing electronic informed consent, participants completed an in-depth touchscreen questionnaire – detailing sociodemographic information, life-course exposures, and medical history – and an array of physical and cognitive measurements. Blood, urine and saliva specimens were also collected and used to generate a wealth of genetic, proteomic and metabolomic data.<sup>3</sup>

### Glaucoma case ascertainment

Glaucoma status at the time of the baseline assessment was determined through interrogation of participants' linked hospital episode statistics (HES) records and retrieval of relevant International Classification of Disease (ICD) coded eye conditions. Specifically, ICD 9<sup>th</sup> (ICD-9) and 10<sup>th</sup> (ICD-10) revision codes, as well as the date of first occurrence, were retrieved for the following conditions: glaucoma (ICD-10 H40), open-angle glaucoma (ICD-9 365.1), POAG (ICD-10 H40.1), glaucoma suspect (ICD-10 H40.0), primary angle closure glaucoma (ICD-10 H40.2 and ICD-9 365.2), glaucoma secondary to other conditions (ICD-10 H40.3 to H40.6 and ICD-9 365.3 to 365.6), other glaucoma (ICD-10 H40.8 and ICD-9 365.8), and unspecified glaucoma (ICD-10 H40.9 and ICD-9 365.9). We excluded participants if they had a diagnosis at 30 years of age or younger, as the pathophysiological mechanisms underlying juvenile glaucoma may differ substantially from those of adult-onset disease.

### Assessment of glaucoma-related outcome measures

IOP was measured in approximately 115 000 participants using an Ocular Response Analyzer (ORA; Reichert Corp., Philadelphia, PA, USA).<sup>4</sup> The ORA is a noncontact tonometer that measures the force required to flatten the cornea using a jet of air. Two measures of intraocular pressure are derived from its readings, a Goldman-correlated IOP (IOPg) and a corneal-compensated IOP (IOPcc). We used IOPcc for our analyses because this measure is thought to provide the most accurate assessment of true physiological IOP and to be least affected by corneal artifact.<sup>5</sup> To handle extreme values of IOP that may be artifacts, we excluded the top and bottom 0.5% of IOP measurements. We also excluded participants with a history of glaucoma surgery or laser therapy, visually-significant ocular trauma, corneal graft surgery or refractive laser surgery, as these participants are likely to have IOP that has been altered from physiological levels. For patients using ocular hypotensive medication, we imputed pre-treatment IOP by dividing by 0.7, based on the mean IOP reduction achieved by medication.<sup>6</sup> We calculated participant-level IOP as the mean of right and left eye values, if data were available for both eyes, or as either the right or left eye value, if data were available for only one eye.

Spectral-domain OCT imaging of both eyes was performed in approximately 65 000 participants using a Topcon 3D OCT-1000 Mark II system (Topcon Corp., Tokyo, Japan) in a dark room without pupil dilation using the 3-dimensional 6x6mm<sup>2</sup> macular volume scan mode (512 A-scans per B-scan; 128 horizontal B-scans in a raster pattern).<sup>4</sup> Version 1.6.1.1 of the Topcon Advanced Boundary Segmentation (TABS) algorithm was used to delineate the inner and outer retinal surfaces.<sup>7</sup> Quality control to exclude images of poor quality has been described in detail previously.<sup>8</sup> We excluded scans with an image quality score (signal strength) less than 45. Additionally, several segmentation indicators were calculated that also identified poor scan quality or segmentation failures; we excluded the poorest 20% of images for each of these indicators. The detailed methods used to derive these indicators are explained elsewhere.<sup>9</sup> We used average mGCIPL and mRNFL thickness parameters derived from the macula-6 grid, as these measures have been shown to be useful glaucoma-related biomarkers.<sup>10,11</sup> Participant-level mGCIPL and mRNFL thicknesses (in micrometers,  $\mu\text{m}$ ) were calculated as the mean of right and left eye values for each participant with high quality images available for both eyes. If data were available only for one eye, we considered that value for the participant.

### Assessment of covariables

All UK Biobank covariables used in this analysis were selected a priori and were ascertained at the time of the baseline assessment and on the same day as the ophthalmic assessment. These comprised: age, sex (women, men), self-reported ethnicity (White, Asian, Black, Other/Mixed), education level (less than O-level, O-level [intermediate high school qualification], A-level [advanced high school qualification], degree [university qualification]), Townsend deprivation index (a measure of material deprivation based on an individual's residential postcode; a higher index score indicates greater relative poverty), diabetes (no, yes), body mass index

(kg/m<sup>2</sup>; calculated as weight/height<sup>2</sup>), total cholesterol (mmol/L), smoking status (never, former, current), and alcohol consumption frequency (never or special occasion only, 1–3 times per month, 1–2 times per week, 3–4 times per week, daily or almost daily).

**eTable 1.** Full Calcium Channel Blocker Code List Used to Identify Medication Users in This UK Biobank Study

| Sub-category                             | Code                            | Description                               |
|------------------------------------------|---------------------------------|-------------------------------------------|
| Dihydropyridine calcium-channel blockers | 1140860426                      | atenolol+nifedipine 50mg/20mg m/r capsule |
|                                          | 1140860358                      | tenif capsule                             |
|                                          | 1140861090                      | adalat 5mg capsule                        |
|                                          | 1140881702                      | adalat 10mg capsule                       |
|                                          | 1140923572                      | adipine mr 10 m/r tablet                  |
|                                          | 1140879802                      | amlodipine                                |
|                                          | 1141200400                      | amlostin 5mg tablet                       |
|                                          | 1140861110                      | angiopine 5mg capsule                     |
|                                          | 1140860356                      | beta-adalat capsule                       |
|                                          | 1141187094                      | cabren 2.5mg m/r tablet                   |
|                                          | 1140916930                      | calanif 5mg capsule                       |
|                                          | 1141173766                      | calchan mr 10mg m/r tablet                |
|                                          | 1140861106                      | calcilat 10mg capsule                     |
|                                          | 1140861176                      | cardene 20mg capsule                      |
|                                          | 1140927934                      | cardilate mr 10mg m/r tablet              |
|                                          | 1141199858                      | cardiopen xl 5mg m/r tablet               |
|                                          | 1140861120                      | coracten sr 10mg m/r capsule              |
|                                          | 1141166752                      | coroday mr 20mg m/r tablet                |
|                                          | 1141188836                      | felendil xl 5mg m/r tablet                |
|                                          | 1140888646                      | felodipine                                |
|                                          | 1141165470                      | felodipine+ramipril                       |
|                                          | 1141188576                      | felogen xl 5mg m/r tablet                 |
|                                          | 1141188152                      | felotens xl 5mg m/r tablet                |
|                                          | 1141145870                      | fortipine la40 m/r tablet                 |
|                                          | 1141152600                      | genalat retard 10mg m/r tablet            |
|                                          | 1140861190                      | isradipine                                |
|                                          | 1141188920                      | keloc sr 5mg m/r tablet                   |
|                                          | 1141187962                      | kentipine mr 10mg m/r tablet              |
|                                          | 1140861276                      | lacidipine                                |
|                                          | 1141153026                      | lercanidipine                             |
|                                          | 1140861282                      | motens 2mg tablet                         |
|                                          | 1141200782                      | neofel xl 5mg m/r tablet                  |
|                                          | 1140879810                      | nicardipine                               |
|                                          | 1140861088                      | nifedipine                                |
|                                          | 1141157140                      | nifedipress mr 10 m/r tablet              |
|                                          | 1141150538                      | nifedotard 20mr m/r tablet                |
|                                          | 1140911088                      | nifelease 20mg m/r tablet                 |
|                                          | 1140861114                      | nifensar xl 20mg m/r tablet               |
|                                          | 1141169730                      | nifopress retard 20mg m/r tablet          |
|                                          | 1140872568                      | nimodipine                                |
|                                          | 1140926966                      | nimodrel mr 10 m/r tablet                 |
|                                          | 1140872472                      | nimotop 30mg tablet                       |
|                                          | 1140928226                      | nisoldipine                               |
|                                          | 1141162546                      | nivaten retard 10mg m/r tablet            |
|                                          | 1140868036                      | parmid 10mg tablet                        |
|                                          | 1141201814                      | parmid xl 5mg m/r tablet                  |
|                                          | 1140928212                      | plendil 2.5mg m/r tablet                  |
|                                          | 1140861194                      | prescal 2.5mg tablet                      |
|                                          | 1141150500                      | slofedipine 20mg m/r tablet               |
|                                          | 1140928234                      | syscor mr 10mg m/r tablet                 |
| 1140927940                               | tensipine mr 10 m/r tablet      |                                           |
| 1140926188                               | unipine xl 30mg m/r tablet      |                                           |
| 1141190548                               | valni 20 retard 20mg m/r tablet |                                           |
| 1140851790                               | vasad 5mg capsule               |                                           |
| 1141190160                               | vasalpha 5mg m/r tablet         |                                           |
| 1141153032                               | zanidip 10mg tablet             |                                           |

|                                              |                            |                                                            |
|----------------------------------------------|----------------------------|------------------------------------------------------------|
| Phenylalkylamine<br>calcium-channel blockers | 1140866546                 | berkatens 40mg tablet                                      |
|                                              | 1140866554                 | cordilox 40mg tablet                                       |
|                                              | 1141169096                 | ethimil mr 240 m/r tablet                                  |
|                                              | 1140866484                 | geangin 40mg tablet                                        |
|                                              | 1140866460                 | half securon sr 120mg m/r tablet                           |
|                                              | 1141187056                 | ranvera mr 240mg m/r tablet                                |
|                                              | 1140866466                 | securon 40mg tablet                                        |
|                                              | 1141153316                 | tarka 2mg/180mg m/r capsule                                |
|                                              | 1141153328                 | trandolapril + verapamil hydrochloride                     |
|                                              | 1140881692                 | univer 120mg m/r capsule                                   |
|                                              | 1141187774                 | vera-til sr 120mg m/r tablet                               |
|                                              | 1140888510                 | verapamil                                                  |
|                                              | 1141150926                 | verapress mr 240 m/r tablet                                |
|                                              | 1141169710                 | vertab sr 240 m/r tablet                                   |
|                                              | 1141184390                 | zolvera 40mg/5ml oral solution                             |
| Benzothiazepine calcium-<br>channel blockers | 1140861138                 | adizem-60 m/r tablet                                       |
|                                              | 1140926780                 | adizem-xl plus m/r capsule                                 |
|                                              | 1140861136                 | angiozem 60mg m/r tablet                                   |
|                                              | 1140917428                 | angitil sr 90 m/r capsule                                  |
|                                              | 1141175224                 | bi-carzem sr 60mg m/r capsule                              |
|                                              | 1140861130                 | britiazim 60mg m/r tablet                                  |
|                                              | 1141153454                 | calazem 60mg m/r tablet                                    |
|                                              | 1140851730                 | calcicard 60mg tablet                                      |
|                                              | 1141157136                 | dilcardia sr 60mg m/r capsule                              |
|                                              | 1140879806                 | diltiazem                                                  |
|                                              | 1140926778                 | diltiazem hcl+hydrochlorothiazide 150mg/12.5mg m/r capsule |
|                                              | 1140861166                 | dilzem sr 60mg long acting m/r capsule                     |
|                                              | 1141185444                 | disogram sr 60mg m/r capsule                               |
|                                              | 1141180238                 | horizem sr 90mg m/r capsule                                |
|                                              | 1140923618                 | kentiazem 60mg m/r capsule                                 |
|                                              | 1141156656                 | optil 60mg m/r tablet                                      |
|                                              | 1140911698                 | slozem 120mg m/r capsule                                   |
|                                              | 1140861128                 | tildiem 60mg m/r tablet                                    |
|                                              | 1141151474                 | viazem xl 120mg m/r capsule                                |
|                                              | 1141174684                 | zemret 180 xl m/r capsule                                  |
|                                              | 1141167832                 | zemtard 120 xl m/r capsule                                 |
| 1141171804                                   | zildil sr 60mg m/r capsule |                                                            |
| Other calcium-channel<br>blockers            | 1141153394                 | mibefradil                                                 |
|                                              | 1141153400                 | posicor 50mg tablet                                        |

**eTable 2.** Full Regression Models for the Association of Calcium Channel Blocker Use With Glaucoma and Intraocular Pressure in the UK Biobank

| Variable                        | Glaucoma (%)<br>(n = 427 480) |            |         |       | IOP (mmHg)<br>(n = 97 100) |              |         |       |
|---------------------------------|-------------------------------|------------|---------|-------|----------------------------|--------------|---------|-------|
|                                 | OR                            | 95% CI     | P-value | VIF   | Beta                       | 95% CI       | P-value | VIF   |
| CCB use                         | 1.39                          | 1.14, 1.69 | .001    | 1.16  | -0.01                      | -0.09, 0.07  | .84     | 1.19  |
| Age (per year)                  | 1.12                          | 1.10, 1.13 | <.001   | 33.95 | 0.07                       | 0.06, 0.07   | <.001   | 57.92 |
| Male sex                        | 1.15                          | 0.98, 1.33 | .08     | 2.03  | 0.56                       | 0.52, 0.61   | <.001   | 2.06  |
| Ethnicity                       |                               |            |         |       |                            |              |         |       |
| White                           | Reference                     |            |         |       | Reference                  |              |         |       |
| Asian                           | 1.63                          | 1.07, 2.49 | .02     | 1.05  | 0.08                       | -0.04, 0.20  | .18     | 1.12  |
| Black                           | 2.49                          | 1.67, 3.71 | <.001   | 1.06  | 0.93                       | 0.81, 1.06   | <.001   | 1.13  |
| Other/Mixed                     | 1.78                          | 1.12, 2.83 | .01     | 1.04  | -0.01                      | -0.14, 0.13  | .94     | 1.07  |
| Education level                 |                               |            |         |       |                            |              |         |       |
| Less than O-level               | Reference                     |            |         |       | Reference                  |              |         |       |
| O-level                         | 1.16                          | 0.96, 1.39 | .13     | 1.63  | 0.15                       | 0.09, 0.21   | <.001   | 1.70  |
| A-level                         | 1.08                          | 0.83, 1.39 | .58     | 1.33  | 0.14                       | 0.06, 0.21   | <.001   | 1.41  |
| Degree                          | 1.02                          | 0.85, 1.23 | .81     | 1.98  | 0.14                       | 0.08, 0.19   | <.001   | 2.29  |
| TDI (per unit)                  | 1.04                          | 1.01, 1.06 | .002    | 1.34  | 0.00                       | -0.01, 0.00  | .37     | 1.26  |
| Diabetes                        | 1.67                          | 1.34, 2.10 | <.001   | 1.19  | 0.24                       | 0.15, 0.34   | <.001   | 1.20  |
| BMI (per kg/m <sup>2</sup> )    | 1.01                          | 0.99, 1.02 | .35     | 28.91 | 0.02                       | 0.02, 0.03   | <.001   | 41.48 |
| Total cholesterol (per mmol/L)  | 0.95                          | 0.89, 1.01 | .13     | 24.40 | 0.15                       | 0.13, 0.17   | <.001   | 29.12 |
| Smoking status                  |                               |            |         |       |                            |              |         |       |
| Never                           | Reference                     |            |         |       | Reference                  |              |         |       |
| Former                          | 0.97                          | 0.83, 1.13 | .70     | 1.75  | -0.10                      | -0.15, -0.06 | <.001   | 1.75  |
| Current                         | 0.97                          | 0.75, 1.26 | .82     | 1.24  | -0.41                      | -0.48, -0.33 | <.001   | 1.24  |
| Alcohol consumption frequency   |                               |            |         |       |                            |              |         |       |
| Never or special occasions only | Reference                     |            |         |       | Reference                  |              |         |       |
| 1–3 times per month             | 0.81                          | 0.63, 1.05 | .12     | 1.58  | 0.01                       | -0.07, 0.09  | .76     | 1.59  |
| 1–2 times per week              | 0.77                          | 0.63, 0.95 | .01     | 2.40  | 0.12                       | 0.05, 0.19   | <.001   | 2.36  |
| 3–4 times per week              | 0.79                          | 0.63, 0.98 | .03     | 2.38  | 0.27                       | 0.20, 0.34   | <.001   | 2.32  |
| Daily or almost daily           | 0.74                          | 0.59, 0.93 | .009    | 2.34  | 0.43                       | 0.36, 0.51   | <.001   | 2.31  |

Final multivariable regression models adjusted for age (years), sex (women, men), self-reported ethnicity (White, Asian, Black, Other/Mixed), education level (less than O-level, O-level, A-level, degree), Townsend deprivation index (units), diabetes (no, yes), body mass index (kg/m<sup>2</sup>), total cholesterol (mmol/L), smoking status (never, former, current), and alcohol consumption frequency (never or special occasion only, 1–3 times per month, 1–2 times per week, 3–4 times per week, daily or almost daily).  
 BMI, body mass index; CCB, calcium-channel blocker; CI, confidence interval; IOP, intraocular pressure; OR, odds ratio; SBP, systolic blood pressure; TDI, Townsend deprivation index; VIF, variance inflation factor.

**eTable 3.** Full Regression Models for the Association of Calcium Channel Blocker Use With OCT-Derived Inner Retinal Parameters in the UK Biobank

| Variable                                        | mGCIPL thickness ( $\mu\text{m}$ )<br>(n = 40 486) |              |         |       | mRNFL thickness ( $\mu\text{m}$ )<br>(n = 40 583) |              |         |       |
|-------------------------------------------------|----------------------------------------------------|--------------|---------|-------|---------------------------------------------------|--------------|---------|-------|
|                                                 | Beta                                               | 95% CI       | P-value | VIF   | Beta                                              | 95% CI       | P-value | VIF   |
| CCB use                                         | -0.34                                              | -0.54, -0.15 | .001    | 1.18  | -0.16                                             | -0.30, -0.02 | .03     | 1.18  |
| Age (per year)                                  | -0.12                                              | -0.12, -0.11 | <.001   | 56.31 | -0.06                                             | -0.06, -0.05 | <.001   | 56.31 |
| Male sex                                        | -0.10                                              | -0.20, 0.01  | .07     | 2.09  | -0.60                                             | -0.68, -0.52 | <.001   | 2.09  |
| Ethnicity                                       |                                                    |              |         |       |                                                   |              |         |       |
| White                                           | Reference                                          |              |         |       | Reference                                         |              |         |       |
| Asian                                           | -1.20                                              | -1.52, -0.89 | <.001   | 1.09  | -1.03                                             | -1.26, -0.80 | <.001   | 1.09  |
| Black                                           | -0.25                                              | -0.56, 0.06  | .11     | 1.12  | -1.65                                             | -1.88, -1.43 | <.001   | 1.12  |
| Other/Mixed                                     | 0.29                                               | -0.03, 0.60  | .07     | 1.07  | -0.42                                             | -0.65, -0.19 | <.001   | 1.07  |
| Education level                                 |                                                    |              |         |       |                                                   |              |         |       |
| Less than O-level                               | Reference                                          |              |         |       | Reference                                         |              |         |       |
| O-level                                         | -0.07                                              | -0.21, 0.07  | .32     | 1.72  | 0.25                                              | 0.14, 0.35   | <.001   | 1.72  |
| A-level                                         | -0.15                                              | -0.32, 0.03  | .10     | 1.43  | 0.52                                              | 0.39, 0.65   | <.001   | 1.43  |
| Degree                                          | -0.21                                              | -0.34, -0.08 | .001    | 2.31  | 0.59                                              | 0.50, 0.69   | <.001   | 2.30  |
| TDI (per unit)                                  | -0.04                                              | -0.06, -0.02 | <.001   | 1.26  | -0.02                                             | -0.03, -0.01 | .004    | 1.26  |
| Diabetes                                        | -0.24                                              | -0.48, 0.00  | .05     | 1.17  | -0.38                                             | -0.55, -0.20 | <.001   | 1.17  |
| BMI (per $\text{kg}/\text{m}^2$ )               | -0.03                                              | -0.04, -0.02 | <.001   | 42.38 | -0.03                                             | -0.04, -0.02 | <.001   | 42.42 |
| Total cholesterol (per $\text{mmol}/\text{L}$ ) | 0.11                                               | 0.06, 0.15   | <.001   | 29.76 | -0.01                                             | -0.04, 0.03  | .68     | 29.74 |
| Smoking status                                  |                                                    |              |         |       |                                                   |              |         |       |
| Never                                           | Reference                                          |              |         |       | Reference                                         |              |         |       |
| Former                                          | 0.09                                               | -0.02, 0.20  | .11     | 1.76  | -0.04                                             | -0.12, 0.04  | .33     | 1.76  |
| Current                                         | 0.26                                               | 0.09, 0.44   | .003    | 1.24  | -0.16                                             | -0.29, -0.03 | .02     | 1.24  |
| Alcohol consumption frequency                   |                                                    |              |         |       |                                                   |              |         |       |
| Never or special occasions only                 | Reference                                          |              |         |       | Reference                                         |              |         |       |
| 1–3 times per month                             | 0.01                                               | -0.18, 0.20  | .92     | 1.62  | 0.08                                              | -0.06, 0.22  | .25     | 1.61  |
| 1–2 times per week                              | -0.04                                              | -0.19, 0.12  | .63     | 2.42  | 0.06                                              | -0.05, 0.18  | .29     | 2.43  |
| 3–4 times per week                              | -0.24                                              | -0.40, -0.07 | .004    | 2.39  | -0.04                                             | -0.16, 0.08  | .48     | 2.39  |
| Daily or almost daily                           | -0.56                                              | -0.73, -0.40 | <.001   | 2.38  | -0.12                                             | -0.25, 0.00  | .049    | 2.38  |

Final multivariable regression models adjusted for age (years), sex (women, men), self-reported ethnicity (White, Asian, Black, Other/Mixed), education level (less than O-level, O-level, A-level, degree), Townsend deprivation index (units), diabetes (no, yes), body mass index ( $\text{kg}/\text{m}^2$ ), total cholesterol ( $\text{mmol}/\text{L}$ ), smoking status (never, former, current), and alcohol consumption frequency (never or special occasion only, 1–3 times per month, 1–2 times per week, 3–4 times per week, daily or almost daily).

BMI, body mass index; CCB, calcium-channel blocker; CI, confidence interval; mGCIPL, macular ganglion cell-inner plexiform layer; mRNFL, macular retinal nerve fiber layer; OCT, optical coherence tomography; OR, odds ratio; SBP, systolic blood pressure; TDI, Townsend deprivation index.

**eTable 4.** Sensitivity Analyses: Association of Calcium Channel Blocker Use With Glaucoma Status in the UK Biobank

| Glaucoma case definition                               | Cases / controls | Model A <sup>1</sup> |            |         | Model B <sup>2</sup> |            |         |
|--------------------------------------------------------|------------------|----------------------|------------|---------|----------------------|------------|---------|
|                                                        |                  | Odds ratio           | 95% CI     | P-value | Odds ratio           | 95% CI     | P-value |
| Any ICD-coded glaucoma                                 | 1 142 / 426 338  | 1.30                 | 1.10, 1.54 | .002    | 1.30                 | 1.10, 1.53 | .003    |
| ICD-coded POAG                                         | 416 / 427 064    | 1.26                 | 0.95, 1.66 | .10     | 1.24                 | 0.94, 1.63 | .13     |
| Self-report and/or any ICD-coded glaucoma              | 6 956 / 144 291  | 1.11                 | 1.03, 1.20 | .005    | 1.11                 | 1.03, 1.19 | .009    |
| Self-report and/or ICD-coded POAG/unspecified glaucoma | 6 897 / 144 350  | 1.12                 | 1.04, 1.20 | .004    | 1.11                 | 1.03, 1.20 | .007    |
| Self-report and/or ICD-coded POAG                      | 6 833 / 144 414  | 1.12                 | 1.04, 1.21 | .004    | 1.11                 | 1.03, 1.20 | .007    |

<sup>1</sup> Model A adjusted for: age (years), sex (women, men), self-reported ethnicity (White, Asian, Black, Other/Mixed), education level (less than O-level, O-level, A-level, degree), Townsend deprivation index (units), diabetes (no, yes), body mass index (kg/m<sup>2</sup>), total cholesterol (mmol/L), smoking status (never, former, current), and alcohol consumption frequency (never or special occasion only, 1–3 times per month, 1–2 times per week, 3–4 times per week, daily or almost daily).

<sup>2</sup> Model B adjusted for: as for Model A, plus additional adjustment for systolic blood pressure (mmHg).  
CI, confidence interval; ICD, International Classification of Disease; POAG, primary open-angle glaucoma.



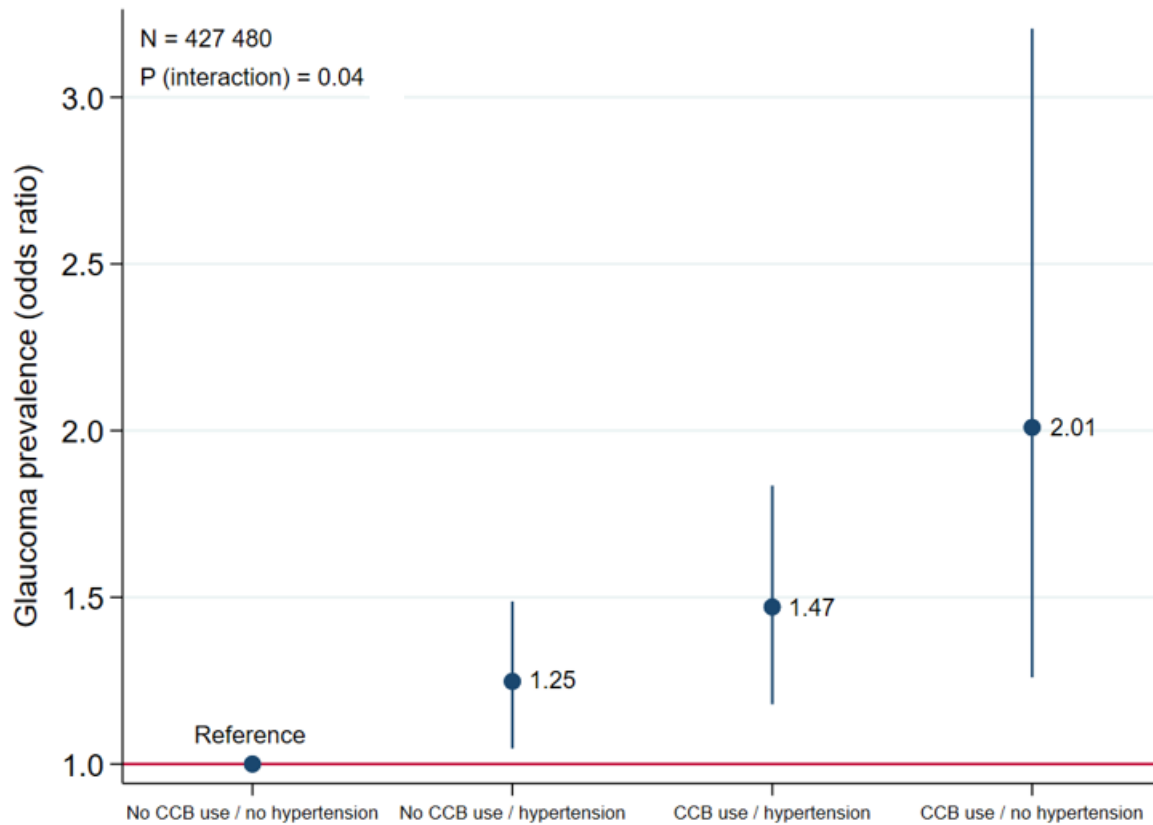

**eFigure.** Interaction of Calcium Channel Blocker Use and Hypertension for the Association With Glaucoma in the UK Biobank

Based on a multivariable logistic regression model including a multiplicative interaction term between calcium-channel blocker use and a history of physician-diagnosed hypertension, and adjusted for: age (years), sex (women, men), self-reported ethnicity (White, Asian, Black, Other/Mixed), education level (less than O-level, O-level, A-level, degree), Townsend deprivation index (units), diabetes (no, yes), body mass index (kg/m<sup>2</sup>), total cholesterol (mmol/L), smoking status (never, former, current), alcohol consumption frequency (never or special occasion only, 1–3 times per month, 1–2 times per week, 3–4 times per week, daily or almost daily), and systolic blood pressure (mmHg). CCB, calcium-channel blocker.

## eReferences

1. Sudlow C, Gallacher J, Allen N, Beral V, Burton P, Danesh J, et al. UK biobank: an open access resource for identifying the causes of a wide range of complex diseases of middle and old age. *PLoS Med*. 2015;12(3):e1001779.
2. Bycroft C, Freeman C, Petkova D, Band G, Elliott LT, Sharp K, et al. The UK Biobank resource with deep phenotyping and genomic data. *Nature*. 2018;562(7726):203–9.
3. Elliott P, Peakman TC, UK Biobank. The UK Biobank sample handling and storage protocol for the collection, processing and archiving of human blood and urine. *Int J Epidemiol*. 2008;37(2):234–44.
4. Chua SYL, Thomas D, Allen N, Lotery A, Desai P, Patel P, et al. Cohort profile: design and methods in the eye and vision consortium of UK Biobank. *BMJ Open*. 2019;9(2):e025077.
5. Luce DA. Determining in vivo biomechanical properties of the cornea with an ocular response analyzer. *J Cataract Refract Surg*. 2005;31(1):156–62.
6. van der Valk R, Webers CAB, Schouten JSAG, Zeegers MP, Hendrikse F, Prins MH. Intraocular pressure-lowering effects of all commonly used glaucoma drugs: a meta-analysis of randomized clinical trials. *Ophthalmology*. 2005;112(7):1177–85.
7. Keane PA, Grossi CM, Foster PJ, Yang Q, Reisman CA, Chan K, et al. Optical Coherence Tomography in the UK Biobank Study - Rapid Automated Analysis of Retinal Thickness for Large Population-Based Studies. *PLoS One*. 2016;11(10):e0164095.
8. Patel PJ, Foster PJ, Grossi CM, Keane PA, Ko F, Lotery A, et al. Spectral-Domain Optical Coherence Tomography Imaging in 67 321 Adults: Associations with Macular Thickness in the UK Biobank Study. *Ophthalmology*. 2016;123(4):829–40.
9. Khawaja AP, Chua S, Hysi PG, Georgoulas S, Currant H, Fitzgerald TW, et al. Comparison of Associations with Different Macular Inner Retinal Thickness Parameters in a Large Cohort: The UK Biobank. *Ophthalmology*. 2020;127(1):62–71.
10. Kim KE, Park KH. Macular imaging by optical coherence tomography in the diagnosis and management of glaucoma. *Br J Ophthalmol*. 2018;102(6):718–24.
11. Oddone F, Lucenteforte E, Michelessi M, Rizzo S, Donati S, Parravano M, et al. Macular versus Retinal Nerve Fiber Layer Parameters for Diagnosing Manifest Glaucoma: A Systematic Review of Diagnostic Accuracy Studies. *Ophthalmology*. 2016;123(5):939–49.
