# Supplementary material
Source: PubMed Central journal article supplement (PMC10485742)
Supplement: jamaophthalmol-e233877-s002.pdf [file jamaophthalmol-e233877-s002.pdf]

**Supplement 2. Nonauthor Collaborators**

\*First name, last name, and suffix (if applicable) are required and will appear in PubMed.

| <b>*Group Name(s): UK Biobank Eye and Vision Consortium</b> |                   |                              |                         |                                |                                                 |                                                                |                                                                                                   |
|-------------------------------------------------------------|-------------------|------------------------------|-------------------------|--------------------------------|-------------------------------------------------|----------------------------------------------------------------|---------------------------------------------------------------------------------------------------|
| <b>*First Name and Middle Initial(s)</b>                    | <b>*Last Name</b> | <b>*Suffix (eg, Jr, III)</b> | <b>Academic Degrees</b> | <b>Institution</b>             | <b>Location (city, state/province, country)</b> | <b>Role or Contribution, eg, chair, principal investigator</b> | <b>Group (if more than 1 Group listed in the byline) and/or Subgroup (eg, Steering Committee)</b> |
| Naomi                                                       | Allen             |                              | Prof                    | University of Oxford           | Oxford, UK                                      |                                                                |                                                                                                   |
| Tariq                                                       | Aslam             |                              | Prof                    | University of Manchester       | Manchester, UK                                  |                                                                |                                                                                                   |
| Denize                                                      | Atan              |                              | Dr                      | University of Bristol          | Bristol, UK                                     |                                                                |                                                                                                   |
| Konstantinos                                                | Balaskas          |                              | Dr                      | Moorfields Eye Hospital        | London, UK                                      |                                                                |                                                                                                   |
| Sarah                                                       | Barman            |                              | Prof                    | Kingston University            | London, UK                                      |                                                                |                                                                                                   |
| Jenny                                                       | Barrett           |                              | Prof                    | University of Leeds            | Leeds, UK                                       |                                                                |                                                                                                   |
| Paul                                                        | Bishop            |                              | Prof                    | University of Manchester       | Manchester, UK                                  |                                                                |                                                                                                   |
| Graeme                                                      | Black             |                              | Prof                    | University of Manchester       | Manchester, UK                                  |                                                                |                                                                                                   |
| Tasanee                                                     | Braithwaite       |                              | Dr                      | St Thomas' Hospital            | London, UK                                      |                                                                |                                                                                                   |
| Roxana                                                      | Carare            |                              | Dr                      | University of Southampton      | Southampton, UK                                 |                                                                |                                                                                                   |
| Usha                                                        | Chakravarthy      |                              | Prof                    | Queen's University Belfast     | Belfast, UK                                     |                                                                |                                                                                                   |
| Michelle                                                    | Chan              |                              | Dr                      | Moorfields Eye Hospital        | London, UK                                      |                                                                |                                                                                                   |
| Sharon                                                      | Chua              |                              | Dr                      | UCL Institute of Ophthalmology | London, UK                                      |                                                                |                                                                                                   |
| Alexander                                                   | Day               |                              | Dr                      | Moorfields Eye Hospital        | London, UK                                      |                                                                |                                                                                                   |
| Parul                                                       | Desai             |                              | Dr                      | Moorfields Eye Hospital        | London, UK                                      |                                                                |                                                                                                   |
| Bal                                                         | Dhillon           |                              | Prof                    | University of Edinburgh        | Edinburgh, UK                                   |                                                                |                                                                                                   |
| Andrew                                                      | Dick              |                              | Prof                    | University of Bristol          | Bristol, UK                                     |                                                                |                                                                                                   |
| Alexander                                                   | Doney             |                              | Dr                      | University of Dundee           | Dundee, UK                                      |                                                                |                                                                                                   |
| Cathy                                                       | Egan              |                              | Dr                      | Moorfields Eye Hospital        | London, UK                                      |                                                                |                                                                                                   |
| Sarah                                                       | Ennis             |                              | Prof                    | University of Southampton      | Southampton, UK                                 |                                                                |                                                                                                   |
| Paul                                                        | Foster            |                              | Prof                    | UCL Institute of Ophthalmology | London, UK                                      |                                                                |                                                                                                   |
| Marcus                                                      | Fruttiger         |                              | Dr                      | UCL Institute of Ophthalmology | London, UK                                      |                                                                |                                                                                                   |
| John                                                        | Gallacher         |                              | Dr                      | University of Oxford           | Oxford, UK                                      |                                                                |                                                                                                   |
| David                                                       | Garway-Heath      |                              | Prof                    | UCL Institute of Ophthalmology | London, UK                                      |                                                                |                                                                                                   |
| Jane                                                        | Gibson            |                              | Dr                      | University of Southampton      | Southampton, UK                                 |                                                                |                                                                                                   |
| Jeremy                                                      | Guggenheim        |                              | Prof                    | Cardiff University             | Cardiff, UK                                     |                                                                |                                                                                                   |
| Chris                                                       | Hammond           |                              | Prof                    | King's College London          | London, UK                                      |                                                                |                                                                                                   |
| Alison                                                      | Hardcastle        |                              | Prof                    | UCL Institute of Ophthalmology | London, UK                                      |                                                                |                                                                                                   |
| Simon                                                       | Harding           |                              | Prof                    | University of Liverpool        | Liverpool, UK                                   |                                                                |                                                                                                   |
| Ruth                                                        | Hogg              |                              | Dr                      | Queen's University Belfast     | Belfast, UK                                     |                                                                |                                                                                                   |
| Pirro                                                       | Hysi              |                              | Dr                      | King's College London          | London, UK                                      |                                                                |                                                                                                   |
| Pearse                                                      | Keane             |                              | Prof                    | UCL Institute of Ophthalmology | London, UK                                      |                                                                |                                                                                                   |
| Peng                                                        | Khaw              |                              | Prof                    | UCL Institute of Ophthalmology | London, UK                                      |                                                                |                                                                                                   |
| Anthony                                                     | Khawaja           |                              | Dr                      | Moorfields Eye Hospital        | London, UK                                      |                                                                |                                                                                                   |

**Supplement 2. Nonauthor Collaborators**

\*First name, last name, and suffix (if applicable) are required and will appear in PubMed.

| *First Name and Middle Initial(s) | *Last Name   | *Suffix (eg, Jr, III) | Academic Degrees | Institution                              | Location (city, state/province, country) | Role or Contribution, eg, chair, principal investigator | Group (if more than 1 Group listed in the byline) and/or Subgroup (eg, Steering Committee) |
|-----------------------------------|--------------|-----------------------|------------------|------------------------------------------|------------------------------------------|---------------------------------------------------------|--------------------------------------------------------------------------------------------|
| Gerassimos                        | Lascaratou   |                       | Mr               | Moorfields Eye Hospital                  | London, UK                               |                                                         |                                                                                            |
| Thomas                            | Littlejohns  |                       | Dr               | University of Oxford                     | Oxford, UK                               |                                                         |                                                                                            |
| Andrew                            | Lotery       |                       | Prof             | University of Southampton                | Southampton, UK                          |                                                         |                                                                                            |
| Robert                            | Luben        |                       | Dr               | UCL Institute of Ophthalmology           | London, UK                               |                                                         |                                                                                            |
| Phil                              | Luthert      |                       | Prof             | UCL Institute of Ophthalmology           | London, UK                               |                                                         |                                                                                            |
| Tom                               | MacGillivray |                       | Dr               | University of Edinburgh                  | Edinburgh, UK                            |                                                         |                                                                                            |
| Sarah                             | Mackie       |                       | Dr               | University of Leeds                      | Leeds, UK                                |                                                         |                                                                                            |
| Savita                            | Madhusudhan  |                       | Dr               | Royal Liverpool University Hospital      | Liverpool, UK                            |                                                         |                                                                                            |
| Bernadette                        | McGuinness   |                       | Dr               | Queen's University Belfast               | Belfast, UK                              |                                                         |                                                                                            |
| Gareth                            | McKay        |                       | Dr               | Queen's University Belfast               | Belfast, UK                              |                                                         |                                                                                            |
| Martin                            | McKibbin     |                       | Dr               | Leeds Teaching Hospitals NHS Trust       | Leeds, UK                                |                                                         |                                                                                            |
| Tony                              | Moore        |                       | Prof             | UCL Institute of Ophthalmology           | London, UK                               |                                                         |                                                                                            |
| James                             | Morgan       |                       | Prof             | Cardiff University                       | Cardiff, UK                              |                                                         |                                                                                            |
| Eoin                              | O'Sullivan   |                       | Prof             | King's College London                    | London, UK                               |                                                         |                                                                                            |
| Richard                           | Oram         |                       | Prof             | University of Exeter                     | Exeter, UK                               |                                                         |                                                                                            |
| Chris                             | Owen         |                       | Prof             | St George's, University of London        | London, UK                               |                                                         |                                                                                            |
| Praveen                           | Patel        |                       | Dr               | Moorfields Eye Hospital                  | London, UK                               |                                                         |                                                                                            |
| Euan                              | Paterson     |                       | Dr               | Queen's University Belfast               | Belfast, UK                              |                                                         |                                                                                            |
| Tunde                             | Peto         |                       | Dr               | Queen's University Belfast               | Belfast, UK                              |                                                         |                                                                                            |
| Axel                              | Petzold      |                       | Dr               | UCL Institute of Neurology               | London, UK                               |                                                         |                                                                                            |
| Nikolas                           | Pontikos     |                       | Dr               | UCL Institute of Ophthalmology           | London, UK                               |                                                         |                                                                                            |
| Jugnoo                            | Rahi         |                       | Prof             | UCL Institute of Child Health            | London, UK                               |                                                         |                                                                                            |
| Alicja                            | Rudnicka     |                       | Dr               | St George's, University of London        | London, UK                               |                                                         |                                                                                            |
| Naveed                            | Sattar       |                       | Prof             | University of Glasgow                    | Glasgow, UK                              |                                                         |                                                                                            |
| Jay                               | Self         |                       | Dr               | University of Southampton                | Southampton, UK                          |                                                         |                                                                                            |
| Panagiotis                        | Sergouniotis |                       | Dr               | University of Manchester                 | Manchester, UK                           |                                                         |                                                                                            |
| Sobha                             | Sivaprasad   |                       | Prof             | Moorfields Eye Hospital                  | London, UK                               |                                                         |                                                                                            |
| David                             | Steel        |                       | Prof             | Newcastle University                     | Newcastle, UK                            |                                                         |                                                                                            |
| Irene                             | Stratton     |                       | Ms               | Gloucestershire Hospitals NHS Foundation | Gloucestershire, UK                      |                                                         |                                                                                            |
| Nicholas                          | Strouthidis  |                       | Dr               | Moorfields Eye Hospital                  | London, UK                               |                                                         |                                                                                            |
| Cathie                            | Sudlow       |                       | Prof             | University of Edinburgh                  | Edinburgh, UK                            |                                                         |                                                                                            |
| Zihan                             | Sun          |                       | Dr               | UCL Institute of Ophthalmology           | London, UK                               |                                                         |                                                                                            |
| Robyn                             | Tapp         |                       | Dr               | St George's, University of London        | London, UK                               |                                                         |                                                                                            |
| Dhanes                            | Thomas       |                       | Dr               | Moorfields Eye Hospital                  | London, UK                               |                                                         |                                                                                            |
| Emanuele                          | Trucco       |                       | Prof             | University of Dundee                     | Dundee, UK                               |                                                         |                                                                                            |

**Supplement 2. Nonauthor Collaborators**

\*First name, last name, and suffix (if applicable) are required and will appear in PubMed.

| <b>*First Name and Middle Initial(s)</b> | <b>*Last Name</b> | <b>*Suffix<br/>(eg, Jr, III)</b> | Academic<br>Degrees | Institution                | Location (city,<br>state/province,<br>country) | Role or Contribution,<br>eg, chair, principal<br>investigator | Group (if more than 1<br>Group listed in the byline)<br>and/or Subgroup (eg,<br>Steering Committee) |
|------------------------------------------|-------------------|----------------------------------|---------------------|----------------------------|------------------------------------------------|---------------------------------------------------------------|-----------------------------------------------------------------------------------------------------|
| Adnan                                    | Tufail            |                                  | Dr                  | Moorfields Eye Hospital    | London, UK                                     |                                                               |                                                                                                     |
| Ananth                                   | Viswanathan       |                                  | Dr                  | Moorfields Eye Hospital    | London, UK                                     |                                                               |                                                                                                     |
| Veronique                                | Vitart            |                                  | Dr                  | University of Edinburgh    | Edinburgh, UK                                  |                                                               |                                                                                                     |
| Mike                                     | Weedon            |                                  | Dr                  | University of Exeter       | Exeter, UK                                     |                                                               |                                                                                                     |
| Katie                                    | Williams          |                                  | Dr                  | King's College London      | London, UK                                     |                                                               |                                                                                                     |
| Cathy                                    | Williams          |                                  | Prof                | University of Bristol      | Bristol, UK                                    |                                                               |                                                                                                     |
| Jayne                                    | Woodside          |                                  | Prof                | Queen's University Belfast | Belfast, UK                                    |                                                               |                                                                                                     |
| Max                                      | Yates             |                                  | Dr                  | University of East Anglia  | Norwich, UK                                    |                                                               |                                                                                                     |
| Yalin                                    | Zheng             |                                  | Dr                  | University of Liverpool    | Liverpool, UK                                  |                                                               |                                                                                                     |
