# Supplementary material
Source: PubMed Central journal article supplement (PMC10485742)
Supplement: jamaophthalmol-e233877-s003.pdf [file jamaophthalmol-e233877-s003.pdf]

## Data Sharing Statement

Kastner. Calcium Channel Blocker Use and Associated Glaucoma and Related Traits Among UK Biobank Participants. *JAMA Ophthalmol.* Published September 07, 2023.

doi:10.1001/jamaophthalmol.2023.3877

### Data

**Data available:** No

### Additional Information

**Explanation for why data not available:** The data used in this study are available to researchers via the UK BIOBANK data repository.
